# Supplementary material for: Urban ozone formation and sensitivities to volatile chemical products, cooking emissions, and NO x upwind of and within two Los Angeles Basin cities
Source: Copernicus journal article supplement (doi:10.5194/acp-25-1121-2025), 2025-01-28
Supplement: Supplementary file 1 [file acp-25-1121-2025-supplement.pdf]

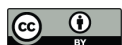

*Supplement of*

**Urban ozone formation and sensitivities to volatile chemical products, cooking emissions, and NO<sub>x</sub> upwind of and within two Los Angeles Basin cities**

**Chelsea E. Stockwell et al.**

*Correspondence to:* Chelsea E. Stockwell ([chelsea.stockwell@noaa.gov](mailto:chelsea.stockwell@noaa.gov))

The copyright of individual parts of the supplement might differ from the article licence.

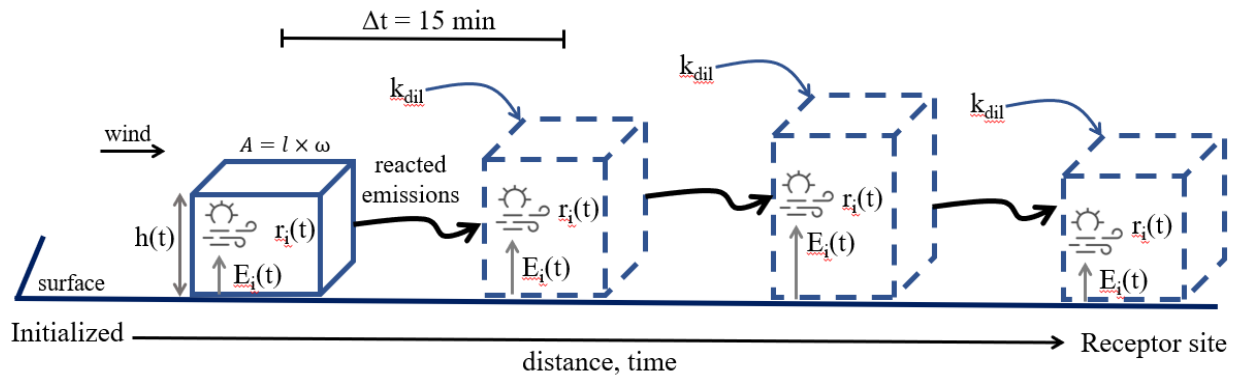

**Figure S1.** A simplified representation of the Lagrangian trajectory box model shows a well-mixed volume of air extending from the surface to the height of the boundary layer ( $h$ ) within a defined area footprint ( $A$ ). Each box model step is a coordinate (latitude, longitude, time) determined every 15 minutes along a trajectory path moving with the wind towards a receptor site. The starting mixing ratios in the initial box (solid box) or resulting from a previous model step (dashed box) are combined with a corresponding emission flux ( $E_i$ ) from the surface. The contents are assumed to mix and chemically process ( $r_i$ ) over the model step interval ( $\Delta t = 15$  min). The mass exchange with the air above and to the sides is represented by entrainment with background air ( $k_{dil}$ ), which is estimated from changing boundary layer heights between model steps.

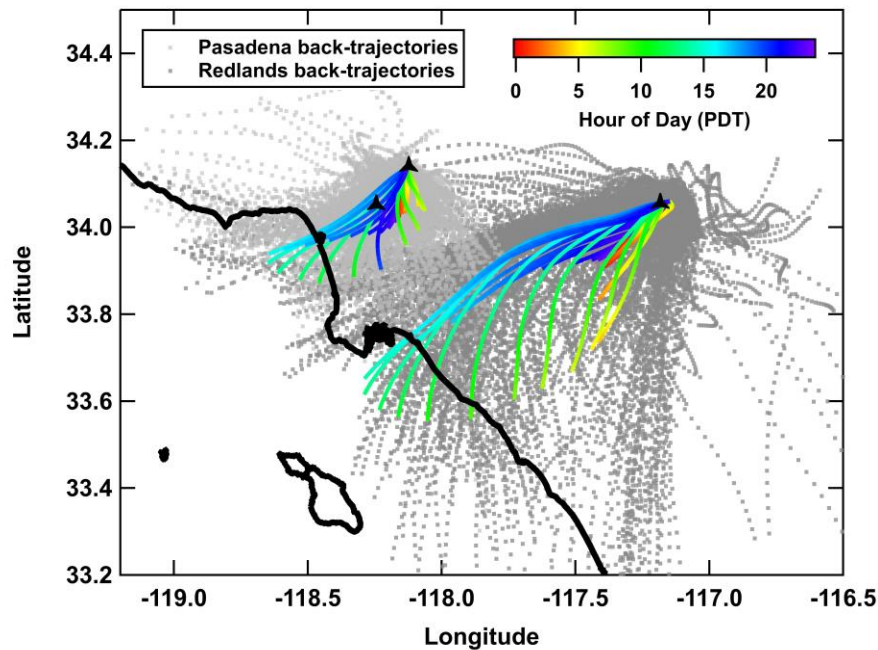

**Figure S2.** Each series of coordinates determined at 15 minute intervals from the FLEXPART-WRF backward trajectory analysis (grey dots). Twenty-five thousand particles (air parcels) were released hourly and traced backward from both Pasadena and Redlands to determine the dominant pathway (744 trajectories, each). The average trace is shown for each hourly release time and is colored by the local time of day.

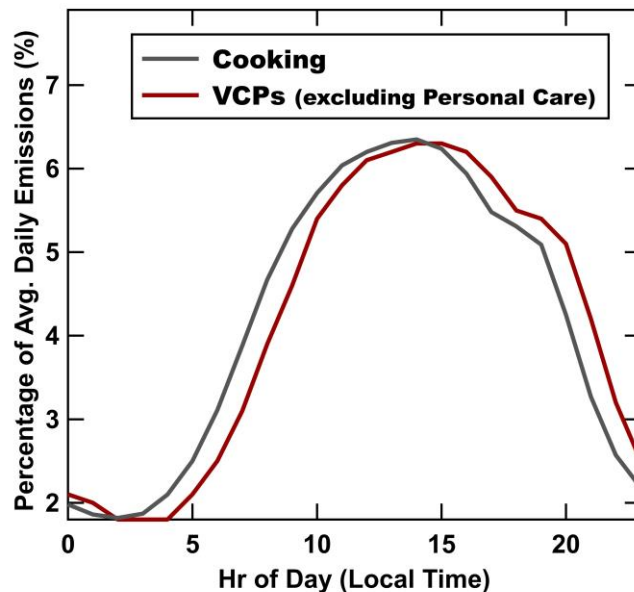

**Figure S3.** The temporal profile of cooking and VCP emissions as a percentage of average daily emissions used in the FIVE-VCP-NEI17NRT inventory. The cooking profile is taken from the 2017 National Emissions Inventory (NEI) commercial cooking temporal profile (code 26).

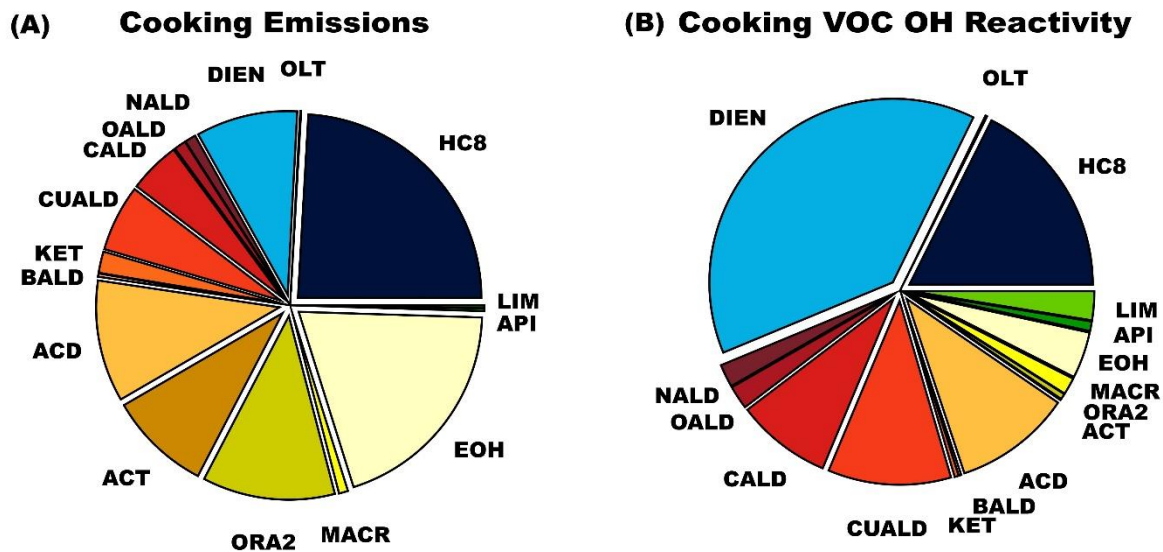

**Figure S4.** (A) The FIVE-VCP-NEI17NRT cooking emissions mapped to RACM2B-VCP species following the definition scheme outlined in Goliff et al. (2013). Chemical species added to the RACM2B-VCP mechanism include cooking saturated aldehydes (CALD), cooking unsaturated aldehydes (CUALD), octanal (OALD), and nonanal (NALD). (B) The lumped estimated VOC OH reactivity from cooking.

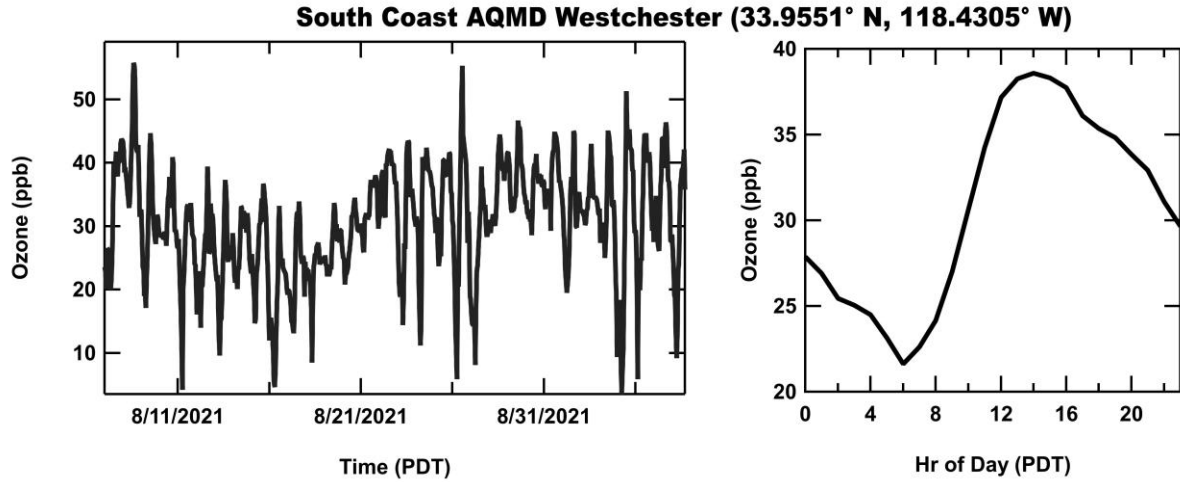

**Figure S5.** The O<sub>3</sub> time-series and diel profile from the South Coast Air Quality Management District (SCAQMD) Westchester site (33.9551° N, 118.4305° W) used as the initial O<sub>3</sub> mixing ratio in the model.

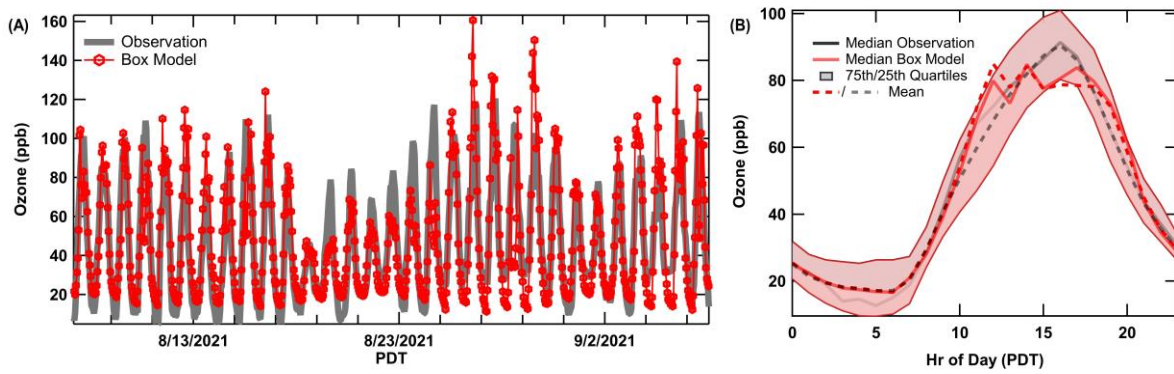

**Figure S6.** (A) The observed ozone time series (grey lines) overlaid with box model output (red markers) from 7 August – 7 September in Redlands, CA. (B) The median diel profile of modeled (red) and measured (grey) ozone in Redlands, CA. The mean is a dashed line and the median is marked by the solid. Shaded regions indicate the 75th- and 25th-quartile ranges.

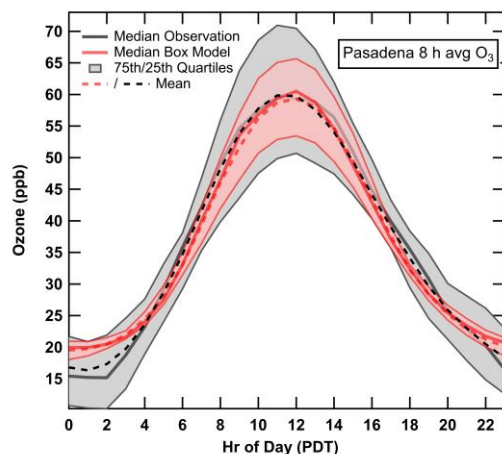

**Figure S7.** The median diel profile of the moving mean 8 h ozone (grey line) overlaid with box model output (red line) in Pasadena, CA. The mean is a dashed line and the median is marked by the solid. Shaded regions indicate the 75th- and 25th-quartile ranges.

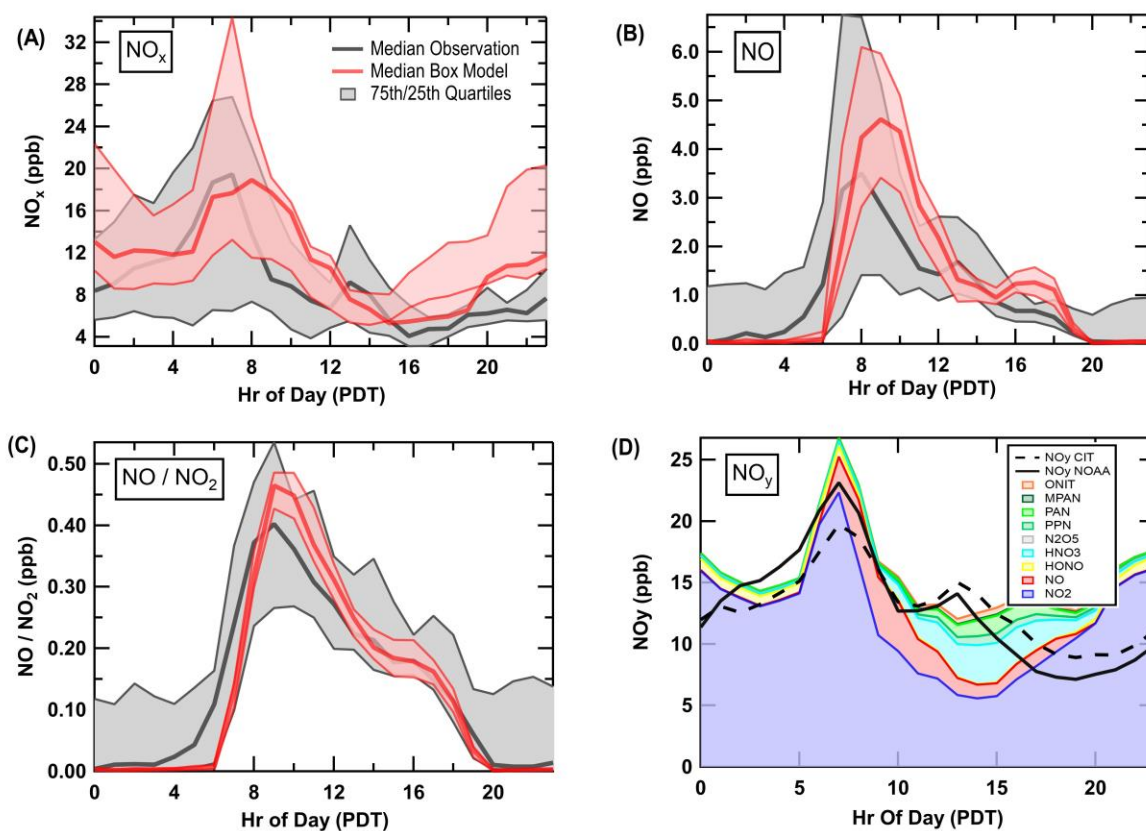

**Figure S8.** (A) The median diel profile  $\text{NO}_x$  (grey line) overlaid with box model output (red line). The mean is a dashed line and the median is marked by the solid line with shaded regions indicating the 75th- and 25th-quartile ranges. The median diel profile of (B)  $\text{NO}$  and (C)  $\text{NO}$ -to- $\text{NO}_2$  observations (grey) and model output (red). (D) The additive model output of speciated nitrogen compounds overlaid with the average  $\text{NO}_y$  measurements from the SUNVEx ground site ( $\text{NO}_y$  NOAA; solid black) and the Linde Laboratory ( $\text{NO}_y$  CIT; dashed black), both in Pasadena, CA.

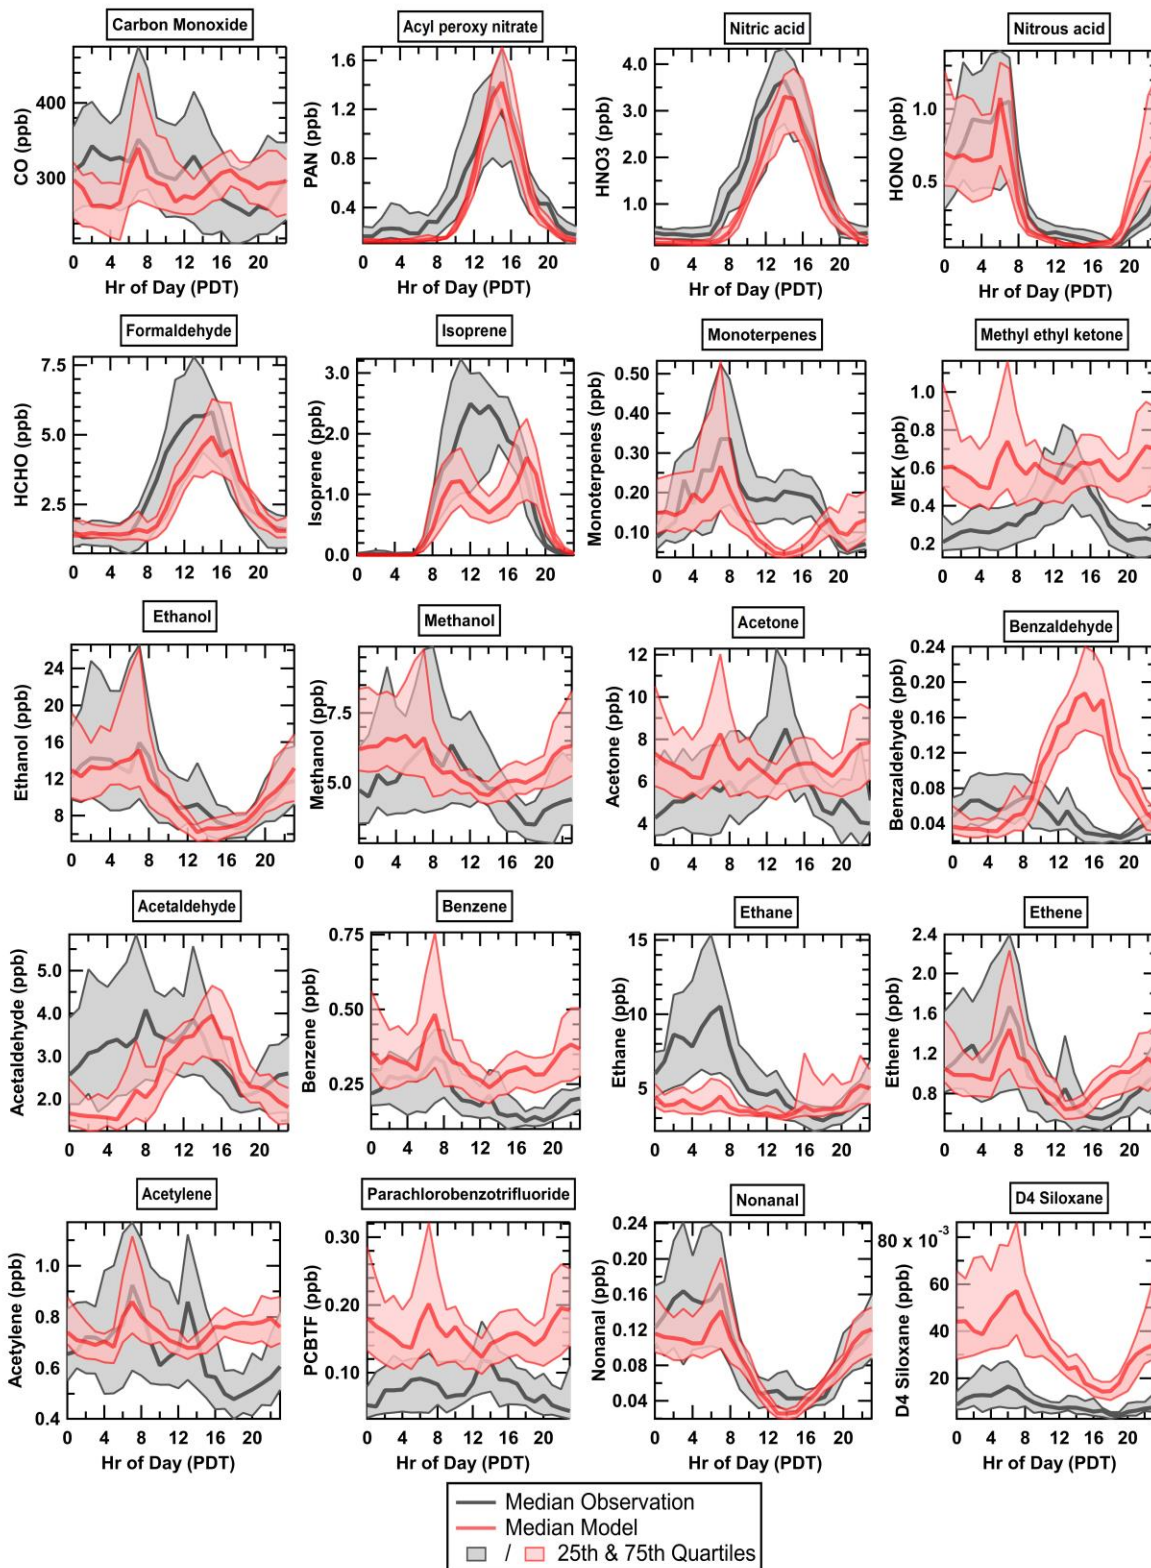

**Figure S9.** (A) The median diel profiles (grey) overlaid with box model results (red) for overlapping species modeled explicitly in the RACM2B-VCP mechanism scheme. The shaded regions indicate the 75th- and 25th-quartile ranges.

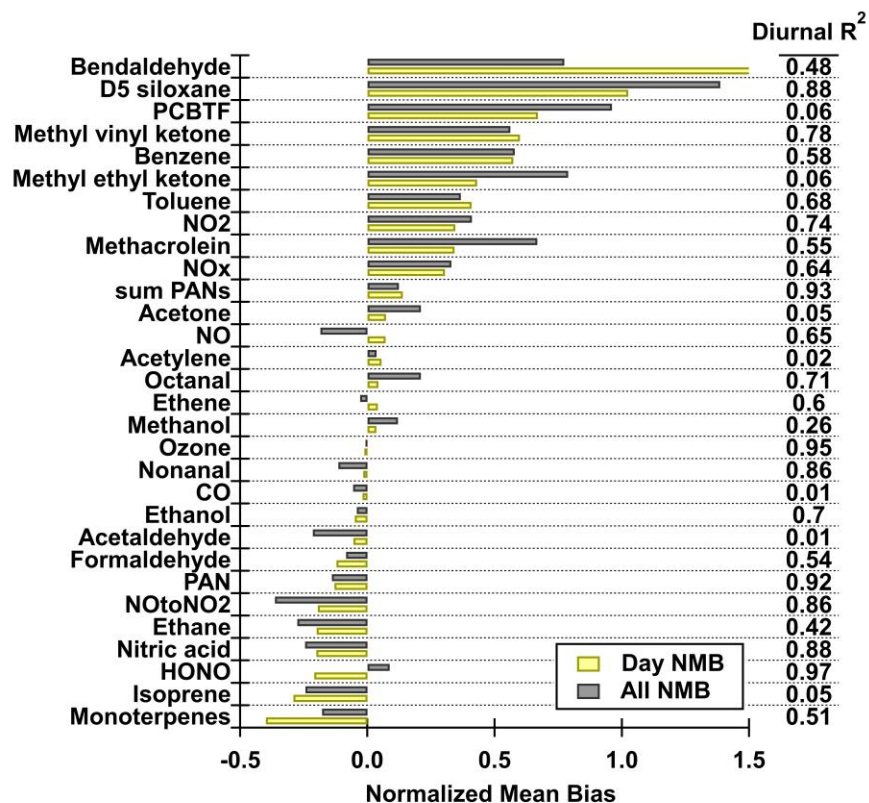

**Figure S10.** The box model normalized mean bias (NMB) and coefficient of determination ( $R^2$ ) for explicit species in RACM2B-VCP that overlap with observations. The hourly NMB is calculated following Eq. (3) for all data (grey) and for daylight hours only (7:00-19:00 LT; yellow).

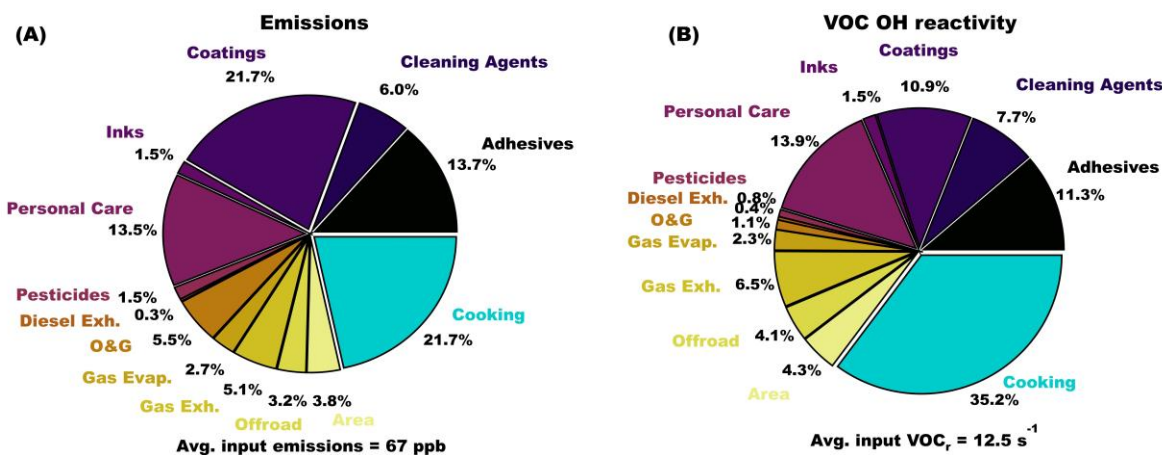

**Figure S11.** (A) The distribution of anthropogenic (A) VOC emissions and (B) VOC OH reactivity by emission source sector input into the model, averaged for arrival times in Pasadena between 12:00-15:00 LT.

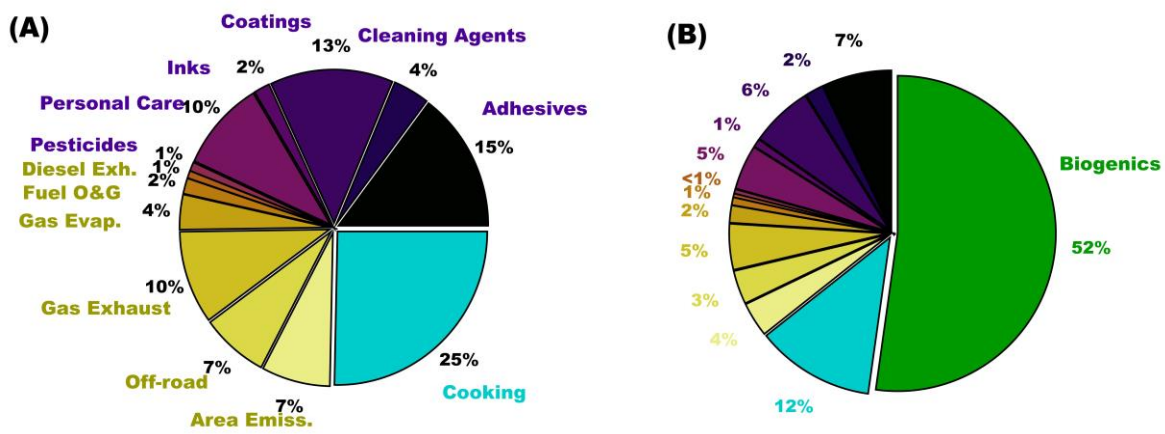

**Figure S12.** The fractional contribution to MDA8 ozone in Redlands, CA from: (A) anthropogenic VOC sources including VCPs (purple shading), fossil fuels (yellow shading), and cooking (blue) emissions. (B) anthropogenic plus biogenic VOCs.



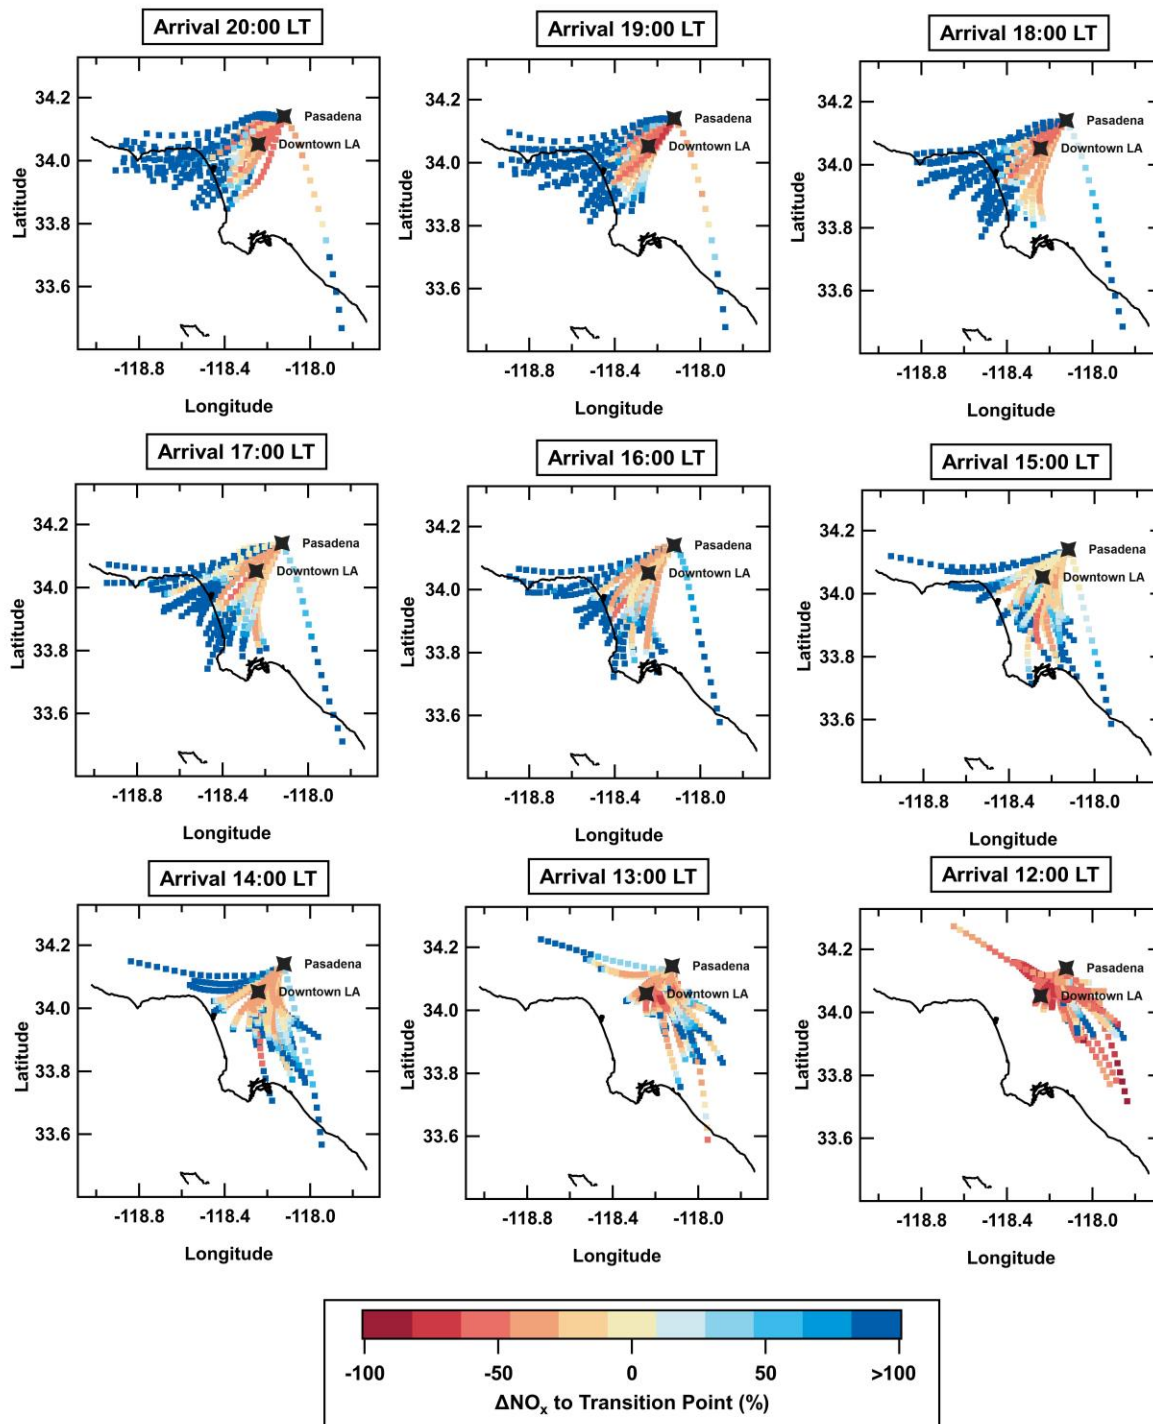

**Figure S13.** Trajectories arriving in Pasadena between 12:00-20:00 LT colored by the percent change in NO<sub>x</sub> needed to transition between photochemical regimes. Warmer colors (-%) indicate the location is currently NO<sub>x</sub>-saturated, while cooler (+%) is NO<sub>x</sub>-limited.

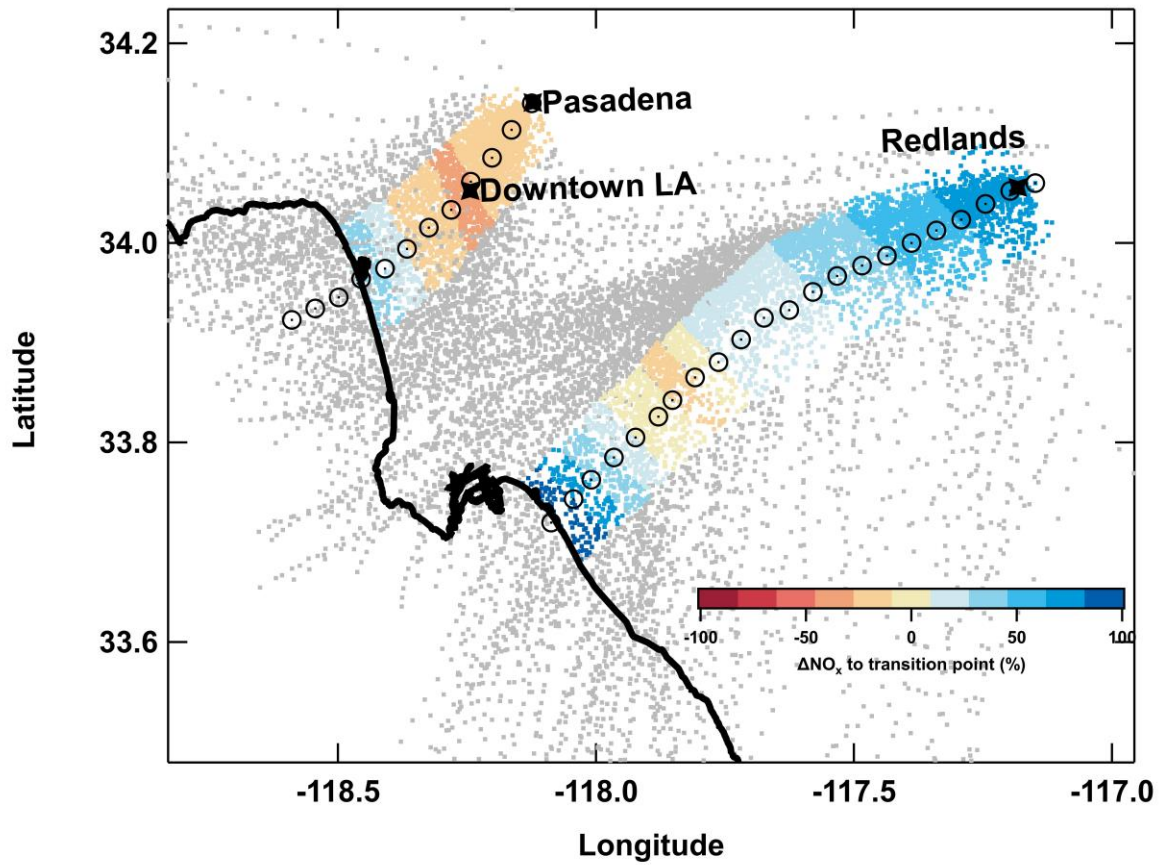

**Figure S14.** The trajectory paths to Pasadena and Redlands, CA averaged from 12:00-20:00 LT (black markers) overlaid with all backward trajectory parcel tracks (grey dots). The average change in  $\text{NO}_x$  emissions required to reach the transition within  $\pm 8$  km of each average trajectory path in 4 km segments is shown where warmer colors (-%) indicate the location is currently  $\text{NO}_x$ -saturated, while cooler (+%) is  $\text{NO}_x$ -limited.

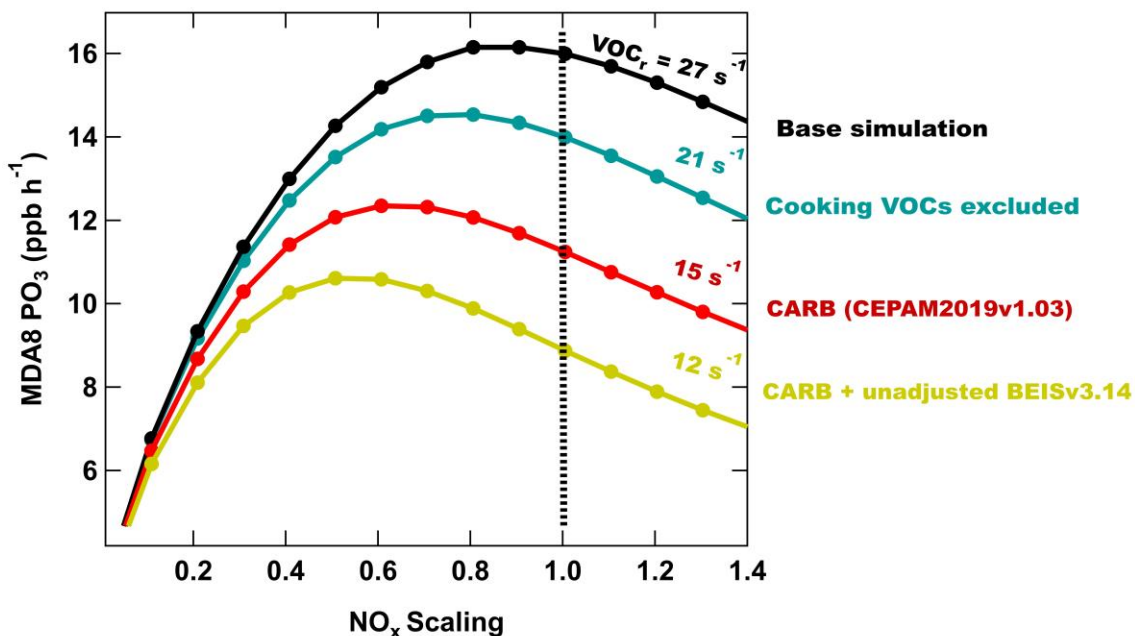

**Figure S15.** The change in the campaign average MDA8 ozone production rate ( $PO_3$ ) as  $NO_x$  is scaled from its initial mixing ratio (hatched line) for the following scenarios: (1) base model simulations, (2) base emissions excluding cooking VOCs (blue), (3) emissions where VOCs were adjusted to better match the CARB-CEPAM inventory emissions (red), and (4) BVOCs scaled down to match the original BVOCs prescribed by the BEIS inventory coupled with WRF-Chem (yellow).  $PO_3$  is defined by Supplemental Eq. (S1).

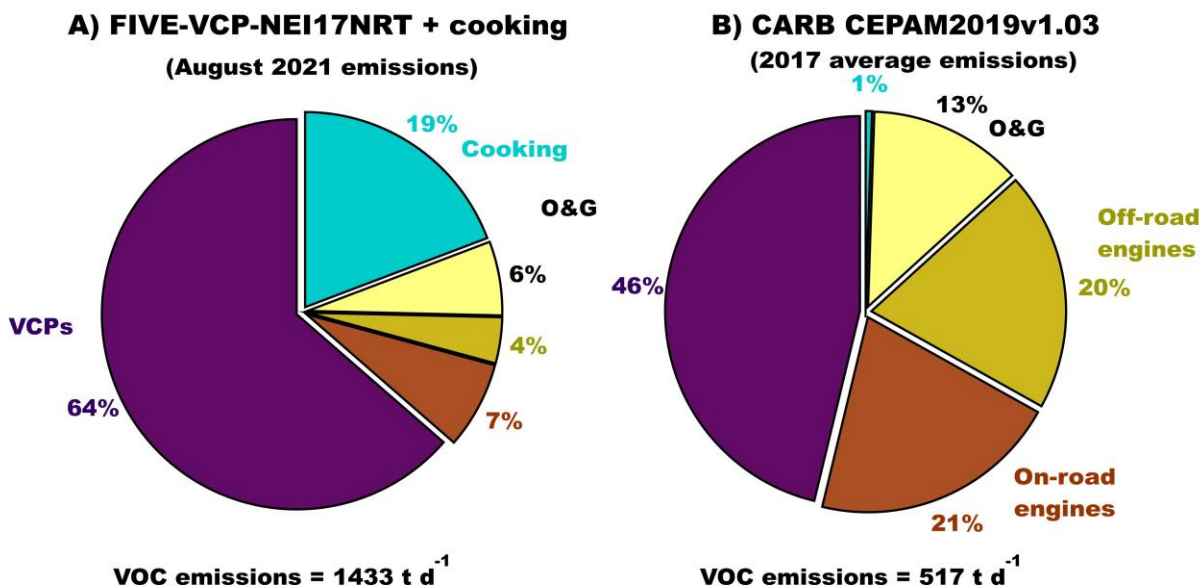

**Figure S16.** Distribution of VOC emissions in the South Coast Air Basin from the (A) FIVE-VCP-NEI17NRT inventory for August, 2021 and (B) CARB CEPAM2019v1.03 tool that represents annual emissions for 2017. Note: In the FIVE-VCP-NEI17NRT inventory base cooking emission estimates were used, and cooking ethanol was not adjusted to align with aircraft flux measurements as outlined in Section 2.2.2.

| Species            | Formula  | WRF  | RACM2B-VCP      | Mass Fraction (base) | Mass Fraction (upper EOH) |
|--------------------|----------|------|-----------------|----------------------|---------------------------|
| Acetaldehyde       | C2H4O    | HC15 | ACD             | 0.068                | 0.043                     |
| Ethanol            | C2H6O    | HC48 | EOH             | 0.130                | 0.449                     |
| Acrolein           | C3H4O    | HC27 | CUALD           | 0.006                | 0.004                     |
| Acetone / propanal | C3H6O    | HC18 | ACT             | 0.075                | 0.048                     |
| Acetic acid        | C2H4O2   | HC31 | ORA2            | 0.068                | 0.043                     |
| Butenal            | C4H6O    | HC67 | CUALD           | 0.006                | 0.004                     |
| Propanoic acid     | C3H6O2   | HC32 | ORA2            | 0.011                | 0.007                     |
| Pentadienal        | C5H6O    | HC46 | DIEN            | 0.039                | 0.024                     |
| Butenedial         | C4H4O2   | HC67 | CUALD           | 0.004                | 0.002                     |
| Pental             | C5H10O   | HC67 | CUALD           | 0.041                | 0.026                     |
| Pentanal           | C5H10O   | HC62 | CALD            | 0.037                | 0.024                     |
| Butyrolactone      | C4H6O2   | HC20 | KET             | 0.014                | 0.009                     |
| Hexadienal         | C6H8O    | HC46 | DIEN            | 0.042                | 0.027                     |
| Pentanoic acid     | C5H10O2  | HC32 | ORA2            | 0.004                | 0.002                     |
| Heptadienal        | C7H10O   | HC46 | DIEN            | 0.004                | 0.003                     |
| Heptenal           | C7H12O   | HC67 | CUALD           | 0.009                | 0.006                     |
| Heptanal           | C7H14O   | HC64 | CALD            | 0.013                | 0.008                     |
| Octadienal         | C8H12O   | HC46 | DIEN            | 0.013                | 0.008                     |
| Octenal            | C8H14O   | HC67 | CUALD           | 0.011                | 0.007                     |
| Octanal            | C8H16O   | HC65 | OALD            | 0.019                | 0.012                     |
| Heptanoic acid     | C7H14O2  | HC32 | ORA2            | 0.001                | 0.000                     |
| Monoterpene        | C10H16   | HC11 | 0.5*LIM+0.5*API | 0.010                | 0.006                     |
| Nondienal          | C9H14O   | HC46 | DIEN            | 0.009                | 0.006                     |
| Nonenal            | C9H16O   | HC67 | CUALD           | 0.004                | 0.002                     |
| Nonanal            | C9H18O   | HC66 | NALD            | 0.020                | 0.013                     |
| Octanoic acid      | C8H16O2  | HC32 | ORA2            | 0.002                | 0.002                     |
| Decatrienal        | C10H14O  | HC46 | DIEN            | 0.014                | 0.009                     |
| Decadienal         | C10H16O  | HC46 | DIEN            | 0.012                | 0.007                     |
| Decenal            | C10H18O  | HC67 | CUALD           | 0.003                | 0.002                     |
| Decanal            | C10H20O  | HC68 | CALD            | 0.004                | 0.003                     |
| Nonanoic acid      | C9H18O2  | HC32 | ORA2            | 0.001                | 0.001                     |
| Undecenal          | C11H22O  | HC67 | CUALD           | 0.001                | 0.001                     |
| Undecanal          | C11H20O  | HC68 | CALD            | 0.002                | 0.001                     |
| Decenoic acid      | C10H18O2 | HC08 | OLT             | 0.002                | 0.001                     |
| Decanoic acid      | C10H20O2 | HC32 | ORA2            | 0.001                | 0.000                     |
| Tridecanal         | C13H26O  | HC68 | CALD            | 0.002                | 0.001                     |
| Furfural           | C5H4O2   | HC68 | CALD            | 0.005                | 0.003                     |
| C7H8O2             | C7H8O2   | HC32 | ORA2            | 0.005                | 0.003                     |
| Benzaldehyde       | C7H6O    | HC17 | BALD            | 0.004                | 0.003                     |
| C6H8O2             | C6H8O2   | HC32 | ORA2            | 0.004                | 0.003                     |

|             |         |      |      |       |       |
|-------------|---------|------|------|-------|-------|
| C6H10O2     | C6H10O2 | HC32 | ORA2 | 0.016 | 0.010 |
| C8H10O2     | C8H10O2 | HC32 | ORA2 | 0.003 | 0.002 |
| C8H12O2     | C8H12O2 | HC32 | ORA2 | 0.003 | 0.002 |
| C8H14O2     | C8H14O2 | HC32 | ORA2 | 0.006 | 0.004 |
| C9H14O2     | C9H14O2 | HC32 | ORA2 | 0.002 | 0.001 |
| C9H16O2     | C9H16O2 | HC32 | ORA2 | 0.002 | 0.002 |
| Unspeciated | NA      | HC06 | HC8  | 0.249 | 0.158 |

**Table S1.** The cooking speciation profile (mass fraction) determined by Coggon et al. (2024) mapped to the RACM2B-VCP mechanism.

| Species                                | Reaction                                                                                      | Rate & Reaction coefficients |
|----------------------------------------|-----------------------------------------------------------------------------------------------|------------------------------|
| Saturated<br>Aldehydes with C ><br>5   | CALD+HO=0.19 HC5P+0.81 RCO3+H2O+OHR+OHVOC                                                     | 7.23e-12*exp(410.0 / T )     |
|                                        | CALD+NO3=0.22 HC5P+0.78 RCO3+HNO3+PHNO3+LNOXHNO3                                              | 1.60E-14                     |
|                                        | CALD+hv=HC5P+HO2+CO                                                                           | JALD                         |
|                                        | CUALD+HO=0.53 MACP+0.47 UALP+OHR+OHVOC                                                        | 8.0e-12*exp(380.0 / T )      |
| Unsaturated<br>Aldehydes with C ><br>5 | CUALD+NO3=MACP+HNO3+PHNO3+LNOXHNO3                                                            | 3.40E-15                     |
|                                        | CUALD+O3=0.902 MGLY+0.242 HCHO+0.238 HO+0.652<br>CO+0.098 RCO3+0.204 ORA1+0.14 HO2+0.144 H2O2 | 1.4e-15*exp(-2100.0 / T )    |
|                                        | CUALD+hv=0.5 MACP+0.175 RCO3+0.5 HCHO+0.325 ETHP+0.825<br>CO+HO2                              | JMACR                        |
|                                        | OALD+hv=HC8P+HO2+CO                                                                           | JALD                         |
| Octanal                                | OALD+HO=0.14 HC8P+0.86 RCO3+H2O+OHR+OHVOC                                                     | 7.78e-12*exp(410.0 / T )     |
|                                        | OALD+NO3=0.2 HC8P+0.8 RCO3+HNO3+PHNO3+LNOXHNO3                                                | 1.70E-14                     |
|                                        | NALD+hv=HC8P+HO2+CO                                                                           | JALD                         |
| Nonanal                                | NALD+HO=0.15 HC8P+0.85 RCO3+H2O+OHR+OHVOC                                                     | 8.08e-12*exp(410.0 / T )     |
|                                        | NALD+NO3=0.19 HC8P+0.81 RCO3+HNO3+PHNO3+LNOXHNO3                                              | 2.00E-14                     |

**Table S2.** Added reactions for cooking saturated aldehydes (CALD), cooking unsaturated aldehydes (CUALD), octanal (OALD), and nonanal (NALD). Additional species identifiers can be found in Goliff et al. (2013).

| RACM2B-<br>VCP Species<br>Name | Background<br>concentration<br>(ppb) |
|--------------------------------|--------------------------------------|
| ACD                            | 0.4                                  |
| ACE                            | 0.5                                  |
| ACT                            | 1.85                                 |
| ALD                            | 0.7                                  |
| EOH                            | 2                                    |
| ETE                            | 0.3                                  |
| ETH                            | 2.4                                  |
| HC3                            | 1.9                                  |
| HC5                            | 0.7                                  |
| HC8                            | 0.8                                  |
| HCHO                           | 0.8                                  |
| MOH                            | 3                                    |
| TOL                            | 0.1                                  |
| CO                             | 160-210                              |
| NO                             | 0.2                                  |
| NO2                            | 1                                    |

**Table S3.** Background concentrations of CO, NO<sub>x</sub>, and VOCs.

$$\begin{aligned}
PO_3 = & k_{HO_2+NO}[HO_2][NO] + \sum_i k_{RO_2_i+NO}[RO_2_i][NO] - k_{O1D+H_2O}[O1D][H_2O] - \\
& k_{OH+NO_2}[OH][NO_2] - k_{HO_2+O_3}[HO_2][O_3] - k_{OH+O_3}[OH][O_3] - k_{alkenes+O_3}[Alkenes][O_3] \quad (S1)
\end{aligned}$$

## References

- Coggon, M. M., Stockwell, C. E., Xu, L., Peischl, J., Gilman, J. B., Lamplugh, A., Bowman, H. J., Aikin, K., Harkins, C., Zhu, Q., Schwantes, R. H., He, J., Li, M., Seltzer, K., McDonald, B., and Warneke, C.: Contribution of cooking emissions to the urban volatile organic compounds in Las Vegas, NV, *Atmos. Chem. Phys.*, 24, 4289-4304, 10.5194/acp-24-4289-2024, 2024.
- Goliff, W. S., Stockwell, W. R., and Lawson, C. V.: The regional atmospheric chemistry mechanism, version 2, *Atmospheric Environment*, 68, 174-185, <https://doi.org/10.1016/j.atmosenv.2012.11.038>, 2013.
